# Supplementary material for: Determining gestational age and preterm birth in rural Guatemala: A comparison of methods
Source: PLoS One. 2018 Mar 19;13(3):e0193666. doi: 10.1371/journal.pone.0193666 (PMC5858755; doi:10.1371/journal.pone.0193666)
Supplement: S1 Dataset — (CSV) [file pone.0193666.s001.csv]

id	ethnicity	income	education	edad	exam_2wks	ga_at_us_final	us_trimester_final	ultr_gestage_final	ultr_preterm_final	weightzscore_us	weightcentile_us	lbw	lmp_month_only	lmp_gestage	lmp_preterm	weightzscore_lmp	weightcentile_lmp	lbw_lmp	exam_ballard	ballard	ballard_wks	ballard_preterm	weightzscore_ballard	weightcentile_ballard	lbw_ballard	piel	lanugo	superficieplanar	mamas	ojooreja	genitales	b_phys_tot	postura	ventanacuadrada	rebotebrazos	popileo	signobufanda	talonoreja	b_neuro_tot	pesosinropa	bebesexo
1	Mam Only	< $133	Diversified or higher	19	1	10.811815	1	36.526226	1	-2.218325335	1.326632896	1	0	37.285713	0	-2.515208242	0.594810473	1	1	37	38.799999	0	-3.046842967	0.115629245	1	3	0	4	3	3	3	16	3	4	4	4	3	3	21	1900	M
2	Mam Only	< $133	Diversified or higher	25	1	17.107143	2	38.107143	0	-1.249851811	10.56768427	0	0	34.285713	1	0.87712089	80.97895104	0	0	35	38	0	-1.188457638	11.73265799	0	3	3	4	2	3	2	17	3	3	3	3	3	3	18	2538.3333	F
3	Mam Only	Don't know	None	33	1	10.595863	1	38.453125	0	-0.628610404	26.48020737	0	0	39	0	-0.863927882	19.38137544	0	1	37	38.799999	0	-0.806580372	20.99541428	0	2	2	4	4	3	2	17	4	4	3	3	3	3	20	2900	M
4	Spanish and Mam	< $133	Basic	23	1	18.285715	2	39.714287	0	-1.215877633	11.20157699	0	0	38.714287	0	-0.851741866	19.71786892	0	1	33	37.200001	0	-0.147294333	44.14498526	0	1	1	4	4	2	3	15	3	3	4	3	3	2	18	2770	F
5	Mam Only	< $133	None	37	1	19.035713	2	38.892857	0	0.448418468	67.3074392	0	0	36.285713	1	1.479517439	93.0498963	0	0	43	41.200001	0	-0.323155932	37.32885765	0	4	1	4	4	3	4	20	4	4	4	4	4	3	23	3401.6667	M
6	Spanish and Mam	< $133	Basic	22	1	11.609171	1	39.180523	0	-1.499405909	6.688418079	1	0	38.714287	0	-1.341330189	8.990663611	1	1	40	40	0	-1.77597445	3.786856422	1	3	3	4	3	3	2	18	3	4	4	3	4	4	22	2590	F
7	Spanish Only	$133-398	Diversified or higher	24	1	14.128912	2	33.700336	1	-0.118764059	45.2731142	0	0	37.285713	0	-2.26634148	1.171524179	1	1	33	37.200001	0	-2.205913941	1.369501295	1	3	2	3	2	3	2	15	3	3	3	3	3	3	18	2006.6667	F
8	Mam Only	Don't know	Basic	22	1	16.928572	2	36.92857	1	-1.65506412	4.895574602	1	0	37	0	-1.723784629	4.237336525	1	1	33	37.200001	0	-1.790517592	3.668537083	1	2	3	4	2	3	3	17	3	3	2	2	3	3	16	2170	F
9	Spanish and Mam	Don't know	Primary	37	1	23.071428	2	38.07143	0	-1.86727274	3.093175506	1	0	38	0	-1.810266575	3.512722891	1	1	39	39.599998	0	-2.349306229	0.940421548	1	4	2	4	4	4	2	20	3	3	3	4	3	3	19	2305	F
10	Spanish Only	< $133	Primary	37	1	19.619047	2	39.476284	0	-1.266772687	10.26182904	0	0	38.714287	0	-1.002364393	15.80838163	0	1	42	40.799999	0	-1.69186198	4.533614628	1	3	4	4	3	4	2	20	4	4	4	3	3	4	22	2715	F
11	Mam Only	< $133	Primary	21	1	11.992294	1	38.420757	0	-0.91080761	18.11983761	0	0	39.142857	0	-1.19949557	11.51676531	0	1	38	39.200001	0	-1.19949557	11.51676531	0	3	2	4	3	3	2	17	4	4	3	3	3	4	21	2790	M
12	Mam Only	< $133	Primary	19	1	13.044972	2	38.473492	0	-0.383889708	35.05300974	0	1	40	0	-0.96326694	16.77067899	0	1	42	40.799999	0	-1.214655965	11.2248667	0	2	4	4	4	4	3	21	4	4	4	3	3	3	21	2898.3333	F
13	Mam Only	< $133	Primary	20	1	14.333333	2	38.904854	0	0.10710229	54.26460848	0	0	38.57143	0	0.217873379	58.62361153	0	1	43	41.200001	0	-0.689280774	24.53232971	0	3	3	4	4	4	3	21	3	4	4	3	4	4	22	3260	M
14	Mam Only	< $133	Primary	22	1	18.892857	2	40.75	0	-0.649167266	25.81151336	0	0	41.42857	0	-0.869779016	19.22105907	0	1	42	40.799999	0	-0.695028578	24.35186961	0	5	1	4	4	4	3	21	4	4	4	3	4	2	21	3223.3333	M
15	Mam Only	< $133	Diversified or higher	20	1	21.107143	2	38.25	0				0	38.714287	0				1	40	40	0				2	2	4	4	3	2	17	4	4	4	4	4	3	23		M
16	Mam Only	< $133	Basic	19	1	15.428572	2	38.142857	0	-0.466829072	32.03110873	0	0	38	0	-0.403971273	34.31169219	0	1	39	39.599998	0	-1.044886231	14.80377771	0	3	2	4	3	4	2	18	4	4	4	3	3	3	21	2915	M
17	Mam Only	Don't know	Primary	37	1	18.714287	2	39.57143	0	-0.015155248	49.39541621	0	1	39.857143	0	-0.108846457	45.66621378	0	1	36	38.400002	0	0.396582819	65.41624378	0	3	3	4	2	3	1	16	3	3	4	4	3	3	20	3200	F
18	Spanish and Mam	< $133	Primary	25	1	13.827093	2	37.827007	0	-0.766478894	22.16957029	0	0						1	38	39.200001	0	-1.290986398	9.835419699	1	3	2	4	3	3	2	17	3	4	4	4	3	3	21	2668.3333	F
19	Mam Only	< $133	Primary	25	1	22	2	38.57143	0	0.644789438	74.04681763	0	0	37.142857	0	1.20415252	88.57346832	0	1	37	38.799999	0	0.53888128	70.50156127	0	3	2	4	2	3	3	17	4	3	4	3	3	3	20	3440	M
20	Spanish and Mam	$133-398	Primary	23	1	11.067339	1	37.352959	0	0.627615583	73.4872101	0	0	43.57143	0				1	33	37.200001	0	0.692100097	75.55627647	0	3	1	4	2	2	1	13	4	4	4	3	3	2	20	3100	F
21	Spanish and Mam	< $133	None	25	1	22.178572	2	39.607143	0	-0.291260772	38.54259433	0	1	39.714287	0	-0.343562304	36.55877389	0	1	41	40.400002	0	-0.593672615	27.63655512	0	3	4	4	4	4	3	22	3	3	4	3	3	3	19	3208.3333	M
22	Mam Only	< $133	Primary	22	1	23.25	2	37.964287	0	-0.277203377	39.08119732	0	0	38.142857	0	-0.339530758	36.71049653	0	1	32	36.799999	1	0.253840464	60.01905943	0	2	2	4	2	2	3	15	3	3	2	3	3	3	17	2870	F
23	Spanish and Mam	< $133	Primary	19	1	23.25	2	38.25	0	-0.311332709	37.77738518	0	0	39.714287	0	-0.880088296	18.94057394	0	1	29	35.599998	1	0.940346796	82.64801483	0	2	1	3	2	2	2	12	3	2	3	4	3	2	17	3000	M
24	Mam Only	< $133	Primary	20	1	21.428572	2	38	0	-1.825324642	3.397602684	1	0	40.285713	0	-2.59637123	0.471071063	1	1	36	38.400002	0	-1.994008631	2.307555566	1	3	1	4	3	3	3	17	4	4	3	3	2	3	19	2345	M
25	Mam Only	$133-398	Basic	18	1	21.666666	2	39.380859	0	-2.880906298	0.198266753	1	0	38.857143	0	-2.721933281	0.32450622	1	1	32	36.799999	1	-1.968926063	2.448079109	1	3	1	4	2	2	3	15	3	4	3	3	1	3	17	2050	F
26	Spanish and Mam	< $133	Primary	30	1	15.714286	2	40.142857	0	-0.853042172	19.68179589	0	0	39.285713	0	-0.538523841	29.51077253	0	1	34	37.599998	0	0.172158835	56.83436704	0	1	2	4	4	3	3	17	3	4	3	3	1	3	17	3070	M
27	Mam Only	< $133	Primary	28	1	18.464287	2	38.607143	0	-0.50170279	30.79383008	0	0	38.714287	0	-0.559440668	28.79305067	0	1	40	40	0	-1.021753681	15.34487484	0	3	2	4	2	3	4	18	4	4	3	4	3	4	22	2876.6667	F
28	Mam Only	< $133	Basic	22	1	17.285715	2	37.857143	0	-2.019861512	2.169887727	1	0	38.142857	0	-2.131953258	1.650534465	1	1	38	39.200001	0	-2.483092279	0.651236711	1	3	4	4	3	3	2	19	3	3	3	4	3	3	19	2235	M
29	Mam Only	< $133	Diversified or higher	19	1	22.5	2	38.5	0	-1.515890093	6.477357292	1	0	38.57143	0	-1.515890093	6.477357292	1	1	36	38.400002	0	-1.458340546	7.23733498	1	2	2	3	3	3	3	16	3	3	3	4	4	3	20	2571.6667	M
30	Spanish Only	$133-398	Primary	34	1	12.345299	1	38.773994	0	-0.252375993	40.03752274	0	0	38.57143	0	-0.194128319	42.30377041	0	1	41	40.400002	0	-0.890519774	18.65934277	0	3	2	4	3	4	4	20	3	4	4	4	3	3	21	3093.3333	M
31	Mam Only	Don't know	None	38	1	15.535714	2	38.82143	0	-1.732795548	4.156600723	1	0	38.857143	0	-1.732795548	4.156600723	1	1	45	42	0	-2.534995104	0.562244488	1	4	2	4	4	4	4	22	4	4	4	4	4	3	23	2461.6667	F
32	Mam Only	< $133	Primary	18	1	21.357143	2	38.07143	0	-0.228891834	40.9476494	0	0	39.714287	0	-0.858684796	19.52572205	0	1	40	40	0	-0.96133078	16.81929381	0	3	2	4	3	3	2	17	4	4	4	4	3	4	23	3008.3333	M
33	Mam Only	< $133	Basic	33	1	19.535715	2	36.392857	1	-1.721918175	4.254217102	1	0	37.142857	0	-2.048776689	2.02419781	1	1	32	36.799999	1	-1.922691994	2.725937144	1	1	2	4	2	2	3	14	4	2	3	4	3	2	18	2090	M
34	Mam Only	< $133	Primary	21	1	11.176935	1	39.176899	0	0.339742433	63.29747483	0	1	39.42857	0	0.237316875	59.37945141	0	1	41	40.400002	0	-0.102704285	45.90988365	0	4	2	4	4	3	3	20	4	4	4	3	3	3	21	3400	M
35	Mam Only	$133-398	Primary	20	1	11.642041	1	38.070591	0	0.468521184	68.02940372	0	0	39.42857	0	-0.069607727	47.22529435	0	0	42	40.799999	0	-0.514035786	30.36134854	0	3	3	4	4	4	4	22	3	4	4	3	3	3	20	3160	F
36	Mam Only	< $133	None	33	1	21.857143	2	40.57143	0	-1.641476613	5.034925893	1	0	39.714287	0	-1.356683376	8.744091849	1	1	39	39.599998	0	-1.305402136	9.587797578	1	4	1	3	4	4	3	19	3	4	4	3	3	3	20	2811.6667	M
37	Mam Only	$133-398	Primary	35	1	17.357143	2	38.5	0	-1.5658511	5.869173999	1	0	34.714287	1	0.468174337	68.01700386	0	1	40	40	0	-2.038371965	2.075637391	1	3	2	4	3	3	2	17	4	4	4	4	3	4	23	2485	F
38	Mam Only	< $133	Primary	26	1	11.740348	1	38.597378	0	-0.223636561	41.15200562	0	0	35.285713	1	1.25782842	89.57730923	0	0	42	40.799999	0	-1.059595007	14.46644432	0	3	2	4	4	4	4	21	4	4	3	4	3	3	21	3081.6667	M
39	Mam Only	< $133	Basic	32	1	8.6166868	1	34.616631	1	-0.282823843	38.86559381	0	0	38.42857	0	-2.307716933	1.050744282	1	1	33	37.200001	0	-1.790517592	3.668537083	1	3	2	3	3	3	2	16	2	4	3	3	2	3	17	2170	F
40	Mam Only	< $133	Primary	31	1	14.143936	2	37.286831	0	0.074094646	52.95324624	0	0	34.285713	1	1.682982629	95.38107729	0	1	28	35.200001	1	1.184770598	88.19459198	0	1	-1	4	3	2	2	11	3	3	4	3	3	1	17	2880	F
41	Mam Only	$133-398	Primary	21	1	15.964285	2	39.107143	0	-1.606224196	5.41123294	1	0	38.857143	0	-1.4981476	6.704745313	1	1	39	39.599998	0	-1.759395925	3.925514176	1	4	2	3	3	3	3	18	3	4	4	4	3	3	21	2625	M
42	Mam Only	< $133	Basic	20	1	18.047619	2	38.333427	0	0.586689298	72.12938017	0	1	37.42857	0	0.937257686	82.56869884	0	1	35	38	0	0.69980721	75.79761444	0	2	1	4	2	3	3	15	4	4	3	3	3	3	20	3255	F
43	Spanish Only	$133-398	Primary	32	1	16.857143	2	40.42857	0	-1.504584128	6.621551478	1	1	41.42857	0	-1.755591145	3.957912266	1	1	39	39.599998	0	-1.239632535	10.75556704	0	3	2	4	4	3	3	19	4	4	3	3	3	3	20	2743.3333	F
44	Mam Only	< $133	Primary	21	1	23.107143	2	37.535713	0	-1.052938281	14.61846399	0	1	29.285715	1	3.72809504	99.99035337	0	1	37	38.799999	0	-1.595164853	5.533768807	1	2	1	4	3	2	3	15	4	4	4	4	3	3	22	2585	M
45	Spanish and Mam	< $133	Primary	32	1	11.617393	1	38.760323	0	-0.217319469	41.39796926	0	0	40	0	-0.679058387	24.8550434	0	1	39	39.599998	0	-0.535293724	29.62233829	0	3	1	4	4	3	3	18	3	4	4	4	3	3	21	3003.3333	F
46	Mam Only	< $133	Primary	32	1	14.21897	2	36.647602	1	-1.735016575	4.136893475	1	0	35.285713	1	-0.984854023	16.23478901	0	1	38	39.200001	0	-2.671208726	0.377893171	1	3	1	4	4	4	3	19	3	3	4	3	3	3	19	2142.5	M
47	Mam Only	< $133	Primary	36	1	10.279485	1	35.851006	1	-0.807714092	20.96275947	0	0	37	0	-1.395749841	8.139491984	1	1	35	38	0	-1.836964902	3.310753847	1	3	2	3	2	3	2	15	3	4	3	3	4	3	20	2340	M
48				21	1	22.464287	2	39.892857	0	-0.751860608	22.60674448	0	0	39.714287	0	-0.69987418	24.20029417	0	0	41	40.400002	0	-0.95043751	17.0944996	0	3	4	4	3	3	3	20	4	3	4	4	4	2	21	3070	M
49	Mam Only	< $133	Primary	33	1	16.392857	2	40.82143	0	-2.713065641	0.3333195	1	1	40.857143	0	-2.713065641	0.3333195	1	0	40	40	0	-2.515331166	0.594603102	1	4	2	4	4	3	4	21	3	4	3	3	3	3	19	2283.3333	F
50	Spanish and Mam	< $133	Diversified or higher	35	1	19.178572	2	37.464287	0	-1.115767669	13.22607982	0	0	41	0	-2.323554668	1.007468721	1	1	28	35.200001	1	0.160949807	56.39335332	0	3	1	4	2	3	1	14	3	3	2	1	3	2	14	2470	F
51	Spanish Only	< $133	Primary	21	1	14.928572	2	36.357143	1	1.288158349	90.11545764	0	0	36.42857	1	1.288158349	90.11545764	0	1	28	35.200001	1	1.852720889	96.80388128	0	1	1	4	2	3	2	13	3	3	4	3	3	-1	15	3340	M
52	Spanish Only	< $133	Basic	20	1	11.857142	1	40.57143	0	-0.15266439	43.9331472	0	0	42.42857	0	-0.599004232	27.45850312	0	1	44	41.599998	0	-0.413818916	33.95033649	0	3	3	4	4	4	4	22	4	4	4	4	3	3	22	3266.6667	F
53	Mam Only	< $133	Basic	18	1	21.214287	2	36.642857	1	-0.124439596	45.04836118	0	0	36	1	0.184287059	57.31058672	0	1	34	37.599998	0	-0.62902999	26.46647112	0	2	2	4	3	3	2	16	4	3	3	3	3	2	18	2670	F
54	Spanish and Mam	$133-398	Primary	35	1	11.518511	1	38.518414	0	-0.160500782	43.62433029	0	0	39.857143	0	-0.657252345	25.55093366	0	1	41	40.400002	0	-0.856212548	19.59401115	0	3	2	4	3	3	4	19	4	4	4	3	3	4	22	3106.6667	M
55	Mam Only	$133-398	None	35	1	20.035713	2	37.892857	0	-0.78440416	21.64014992	0	0	38	0	-0.848415732	19.81032422	0	1	40	40	0	-1.626368308	5.193566428	1	3	2	3	4	4	3	19	4	4	4	4	2	3	21	2741.6667	M
56	Spanish and Mam	Don't know	None	18	1	11.067339	1	37.781528	0	-0.234448235	40.73185078	0	1	39.57143	0	-0.983401691	16.27048892	0	1	38	39.200001	0	-0.829867973	20.33067172	0	3	2	3	4	4	3	19	3	4	3	3	3	3	19	2838.3333	F
57	Mam Only	< $133	Basic	18	1	19.535713	2	40.25	0	-1.367405702	8.574908804	1	0	40.857143	0	-1.524962139	6.363427067	1	1	42	40.799999	0	-1.524962139	6.363427067	1	4	2	4	3	4	3	20	4	4	4	4	3	3	22	2780	F
58	Spanish and Mam	Don't know	Primary	21	1	20.214287	2	39.5	0	-1.388205443	8.253724769	1	0	40	0	-1.537532443	6.208148829	1	1	37	38.799999	0	-1.116872982	13.20243192	0	3	0	4	4	3	3	17	4	4	3	3	3	3	20	2778.3333	M
59	Mam Only	< $133	Primary	21	1	19.964287	2	37.82143	0	-1.863577754	3.119051205	1	1	35.714287	1	-0.821608872	20.5649769	0	1	33	37.200001	0	-1.551880704	6.034538538	1	3	1	3	2	3	2	14	3	3	3	4	3	3	19	2303.3333	M
60	Mam Only	< $133	Primary	19	1	13.713241	2	36.141743	1	-0.40274463	34.3568049	0	0	37.714287	0	-1.180982144	11.88049084	0	1	38	39.200001	0	-1.761263974	3.90968673	1	3	1	3	3	4	3	17	4	4	4	3	3	3	21	2560	M
61	Mam Only	< $133	Primary	34	1	18.892857	2	38.464287	0	-1.492509945	6.778275603	1	0	39.714287	0	-1.938763088	2.626509635	1	1	38	39.200001	0	-1.755485907	3.958811458	1	3	2	3	3	3	3	17	4	3	4	4	3	3	21	2491.6667	F
62	Mam Only	< $133	Diversified or higher	22	1	17.571428	2	42.142857	0	-1.63402643	5.112665059	1	0	37	0	0.132771133	55.28128077	0	1	42	40.799999	0	-1.342284344	8.975190881	1	3	2	4	2	4	4	19	4	4	4	4	3	4	23	2850	F
63	Mam Only	< $133	Primary	36	1	14.857142	2	38.714287	0	-1.231502171	10.90675525	0	1	37.57143	0	-0.734433084	23.13424145	0	1	34	37.599998	0	-0.734433084	23.13424145	0	3	2	3	2	3	3	16	3	3	3	3	3	3	18	2710	M
64	Mam Only	< $133	Basic	18	1	15.428572	2	37.857143	0	-0.831330087	20.28935912	0	0	38.42857	0	-1.080374823	13.99876514	0	1	36	38.400002	0	-1.080374823	13.99876514	0	3	2	3	2	3	3	16	4	3	3	3	3	4	20	2723.3333	M
65	Mam Only	Don't know	Primary	22	1	23.107143	2	38.107143	0	0.978959905	83.62001045	0	0	33.714287	1	3.029800936	99.87764251	0	1	40	40	0	0.340937311	63.34246122	0	2	1	4	3	4	3	17	4	4	4	4	4	3	23	3396.6667	F
66	Mam Only	$133-398	Diversified or higher	18	1	12.393046	1	39.393135	0	-1.705263538	4.407264231	1	0	39.57143	0	-1.751343755	3.994335753	1	1	37	38.799999	0	-1.506237385	6.60031228	1	3	1	4	4	3	3	18	3	3	4	3	3	3	19	2548.3333	F
67	Mam Only	$133-398	Diversified or higher	29	1	18.285715	2	37.714287	0	0.015857827	50.63260924	0	0	32.142857	1	2.783499311	99.73112012	0	1	39	39.599998	0	-0.74581635	22.78891808	0	3	1	4	4	4	3	19	4	4	3	4	2	3	20	3031.6667	M
68	Mam Only	$133-398	Basic	24	1	13.269305	2	39.126396	0	-0.598878604	27.46269203	0	0	37.857143	0	-0.063143446	47.48261392	0	0	44	41.599998	0	-1.413874748	7.86993407	1	3	2	4	4	4	3	20	4	4	4	4	4	4	24	3025	M
69	Mam Only	< $133	Primary	24	1	13.142858	2	38.142857	0	0.119123937	54.74114167	0	0	36.714287	1	0.737567158	76.96112407	0	1	38	39.200001	0	-0.282339677	38.88415322	0	3	2	3	3	3	3	17	4	4	3	4	3	3	21	3148.3333	M
70	Spanish and Mam	Don't know	Basic	23	1	11.714286	1	38.285713	0	-0.784966422	21.6236628	0	0	39.42857	0	-1.226543597	10.99970898	0	1	36	38.400002	0	-0.845188861	19.90027004	0	2	2	4	3	3	3	17	3	3	4	4	3	2	19	2730	F
71	Mam Only	$133-398	Primary	19	1	11.571428	1	38.57143	0	0.567058311	71.46627172	0	0	40.57143	0	-0.132083175	44.74592517	0	0	38	39.200001	0	0.355710814	63.89714273	0	3	2	3	4	3	3	18	4	3	4	3	3	3	20	3406.6667	M
72	Mam Only	< $133	Primary	31	1	18.892857	2	33.75	1	-1.386467832	8.280204814	1	0	33.57143	1	-1.277356664	10.07381785	0	1	26	34.400002	1	-1.886842024	2.959078847	1	3	1	3	2	3	1	13	3	3	1	3	1	2	13	1568.3334	F
73	Spanish Only	$133-398	Diversified or higher	36	1	15	2	39.42857	0	-0.186875804	42.58790054	0	0	39.142857	0	-0.08539632	46.59731593	0	0	43	41.200001	0	-0.710982977	23.85473922	0	3	3	4	3	3	4	20	4	4	4	4	3	4	23	3115	F
74	Mam Only	< $133	Diversified or higher	24	1	18.571428	2	37.714287	0	-1.677862616	4.668696099	1	0	37.57143	0	-1.615434123	5.310835787	1	1	26	34.400002	1	0.197644582	57.83384243	0	2	0	4	3	1	2	12	4	2	2	2	2	2	14	2310	F
75	Mam Only	< $133	Diversified or higher	22	1	19	2	36.857143	1	-0.178872227	42.90190154	0	0	37	0	-0.251614381	40.06695708	0	0	37	38.799999	0	-1.08536578	13.88798412	0	3	2	3	3	3	3	17	4	4	3	3	3	3	20	2705	F
76	Mam Only	< $133	Diversified or higher	21	1	15.428572	2	40.285713	0	-0.357081309	36.05154682	0	0	41.857143	0	-0.771842703	22.01037981	0	1	42	40.799999	0	-0.522938523	30.05085176	0	3	2	4	4	3	4	20	3	4	4	4	3	4	22	3156.6667	F
77	Mam Only	< $133	Basic	20	1	11	1	39.42857	0	-0.820170833	20.60593635	0	0	40	0	-1.012762839	15.55867273	0	0	38	39.200001	0	-0.7160745	23.69726743	0	3	2	3	4	3	2	17	4	4	3	4	3	3	21	2880	F
78	Mam Only	< $133	Primary	33	1	14.285714	2	38.714287	0	-1.06607093	14.31957898	0	0	39.714287	0	-1.424300514	7.717974941	1	0	40	40	0	-1.513908438	6.50245319	1	3	2	4	4	3	4	20	4	4	3	3	3	3	20	2691.6667	F
79	Mam Only	< $133	Primary	27	1	15.857142	2	36.714287	1	-1.78770793	3.691157087	1	0	36.857143	1	-1.853718946	3.188968985	1	0	32	36.799999	1	-1.853718946	3.188968985	1	3	2	3	3	3	2	16	3	3	2	3	2	3	16	2120	M
80	Mam Only	< $133	Primary	21	1	19.142857	2	37.857143	0	-1.024547954	15.27882664	0	0	42.857143	0	-2.411243226	0.794912109	1	0	43	41.200001	0	-2.106504844	1.758026139	1	4	2	4	3	3	4	20	4	4	4	4	3	4	23	2575	F
81	Spanish and Mam	< $133	Primary	31	1	18.857143	2	39.142857	0	-0.089726884	46.42521258	0	0	39.42857	0	-0.191257557	42.41619061	0	1	42	40.799999	0	-0.638968	26.14218748	0	3	2	4	4	3	3	19	4	4	4	4	3	4	23	3113.3333	F
82	Mam Only	< $133	Diversified or higher	20	1	16.107143	2	38.535713	0	-1.244430924	10.66705038	0	0	38.142857	0	-1.063898394	14.36873654	0	0	39	39.599998	0	-1.624211777	5.216530913	1	3	3	3	3	3	2	17	4	3	3	4	4	4	22	2681.6667	M
83	Mam Only	< $133	Basic	20	1	11	1	38.142857	0	-0.222806607	41.18430127	0	0	40.142857	0	-0.967872695	16.65539763	0	1	37	38.799999	0	-0.515924144	30.29536951	0	3	2	3	3	3	3	17	3	4	4	3	3	3	20	2913.3333	F
84	Spanish and Mam	$133-398	Basic	22	1	11.352633	1	38.35268	0	-0.159405982	43.66745132	0	1	42.285713	0	-1.515059496	6.487866886	1	1	41	40.400002	0	-0.976064464	16.45162599	0	3	2	4	3	3	4	19	4	4	4	4	2	4	22	3060	M
85	Mam Only	< $133	Primary	18	1	20.964287	2	39.535713	0	-0.449361334	32.65855096	0	1	38.714287	0	-0.117738487	45.31374353	0	1	39	39.599998	0	-0.449361334	32.65855096	0	3	2	3	4	3	3	18	4	3	4	4	3	3	21	3146.6667	M
86	Mam Only	< $133	Primary	22	1	19.714285	2	38.285713	0	-2.283878939	1.118932337	1	0	37	0	-1.755926382	3.955048979	1	1	36	38.400002	0	-2.335638431	0.975504691	1	3	1	4	2	3	3	16	3	3	4	4	3	3	20	2190	M
87	Mam Only	< $133	Primary	26	1	17.571428	2	38.285713	0	-1.764934145	3.878741715	1	0	39.57143	0	-2.226263389	1.299827211	1	1	35	38	0	-1.648349488	4.964048751	1	3	2	3	2	3	3	16	3	3	3	4	3	3	19	2420	M
88	Mam Only	< $133	Primary	28	1	15	2	40.42857	0	-1.642544525	5.023860332	1	0	40.857143	0	-1.755269864	3.960657933	1	1	38	39.200001	0	-1.232768605	10.88310537	0	3	2	3	4	3	3	18	4	3	4	3	3	3	20	2690	F
89	Mam Only	$133-398	Basic	27	1	12.857142	1	38.142857	0	0.873489755	80.8801906	0	0	38.142857	0	0.873489755	80.8801906	0	1	40	40	0	0.230152488	59.10133601	0	3	4	3	4	3	3	20	3	3	3	4	3	4	20	3351.6667	F
90	Mam Only	< $133	Primary	19	1	12.571428	1	37.42857	0	-0.125470531	45.00755269	0	0	38.42857	0	-0.569479923	28.45152459	0	1	41	40.400002	0	-1.322838915	9.294447637	1	2	3	4	3	3	3	18	4	4	4	4	3	4	23	2923	M
91	Mam Only	$133-398	Diversified or higher	22	1	9.5714283	1	37.857143	0	-0.660464583	25.44778696	0	0	38.57143	0	-0.970752199	16.58358457	0	0	38	39.200001	0	-1.19949557	11.51676531	0	4	2	3	3	3	3	18	3	4	4	3	3	3	20	2790	M
92	Mam Only	Don't know	None	33	1	13.285714	2	34.57143	1	-0.760878288	22.3364884	0	0	34.42857	1	-0.671587739	25.09230929	0	1	35	38	0	-2.451080278	0.712140922	1	3	2	3	3	3	2	16	3	4	3	3	3	3	19	2061.6667	M
93	Mam Only	< $133	Primary	19	1	15.428572	2	38	0	-0.051270538	47.95549721	0	0	39	0	-0.457897146	32.35131688	0	1	40	40	0	-0.809937444	20.8988065	0	2	2	4	3	3	3	17	4	4	4	4	3	4	23	2955	F
94	Mam Only	$133-398	Basic	25	1	10.428572	1	38.142857	0	-1.567590961	5.848831143	1	0	38.857143	0	-1.839736362	3.290347621	1	1	41	40.400002	0	-2.307401061	1.051623607	1	3	3	4	4	3	2	19	4	4	4	4	2	4	22	2420	F
95	Mam Only	< $133	Primary	18	1	12	1	37.142857	0	-1.91376476	2.782511007	1	0	37.285713	0	-1.97732671	2.400235622	1	0	40	40	0	-2.868455635	0.206240521	1	4	4	3	3	3	3	20	4	4	4	3	2	3	20	2122.5	F
96	Mam Only	$133-398	Primary	21	1	14.714286	2	36.857143	1	-1.353235037	8.79902777	1	0	37	0	-1.424465074	7.715594417	1	1	33	37.200001	0	-1.493767465	6.761820402	1	3	1	3	3	3	2	15	3	4	3	3	2	3	18	2281.6667	F
97	Mam Only	< $133	Diversified or higher	39	1	11.428572	1	39.142857	0	-1.340068279	9.011157381	1	0	39.714287	0	-1.533778044	6.254213305	1	1	45	42	0	-2.100200782	1.78555913	1	4	2	4	4	4	4	22	4	4	4	4	3	4	23	2650	F
98	Mam Only	< $133	Primary	18	1	18.464287	2	41.17857	0	-1.778332668	3.767461704	1	0	40.857143	0	-1.708815102	4.374260218	1	1	39	39.599998	0	-1.333121954	9.124589295	1	4	2	4	1	3	3	17	4	4	4	3	4	3	22	2708.3333	F
99	Mam Only	$133-398	Basic	22	1	19.214287	2	40.357143	0	-0.740173732	22.95972921	0	0	40.42857	0	-0.740173732	22.95972921	0	1	33	37.200001	0	0.520394498	69.86056778	0	3	1	4	2	3	3	16	2	4	2	3	3	3	17	3030	F
100	Mam Only	< $133	Primary	28	1	15.142858	2	39.857143	0	-1.562022322	5.914136517	1	1	38	0	-0.831361649	20.28846786	0	1	43	41.200001	0	-1.95777306	2.512832393	1	3	2	4	4	3	4	20	4	4	4	4	3	4	23	2748.3333	M
101	Mam Only	< $133	Diversified or higher	25	1	17	2	36	1	-0.91816211	17.9267001	0	0	36.714287	1	-1.312196358	9.472694522	1	1	36	38.400002	0	-2.06373767	1.952129783	1	3	2	4	2	3	3	17	3	3	4	3	3	3	19	2270	F
102	Spanish Only	$133-398	Primary	23	1	13.576111	2	37.861885	0	-1.015358002	15.49676026	0	0	39.57143	0	-1.674242978	4.704142805	1	1	39	39.599998	0	-1.674242978	4.704142805	1	3	3	3	3	3	3	18	4	4	3	4	3	3	21	2578.3333	F
103	Mam Only	Don't know	Primary	19	1	12.732714	1	38.018414	0	-0.916527304	17.96951968	0	0	39	0	-1.331826633	9.145858212	1	1	41	40.400002	0	-1.827160949	3.383778671	1	3	3	4	4	4	3	21	3	4	3	4	3	3	20	2715	M
104	Mam Only	< $133	Primary	21	1	13.428572	2	39.42857	0	-2.432773566	0.749183394	1	0	38.142857	0	-2.002631564	2.260842469	1	1	34	37.599998	0	-1.768897666	3.845547689	1	3	2	1	3	3	2	14	4	4	3	3	3	3	20	2251.6667	F
105	Mam Only	< $133	Primary	19	1	12.709154	1	37.994976	0	-1.732421494	4.159927188	1	0	38.714287	0	-2.004007552	2.253462575	1	1	35	38	0	-1.732421494	4.159927188	1	2	3	3	3	3	3	17	3	4	3	3	3	2	18	2335	F
106	Mam Only	Don't know	None	29	1	12.567372	1	37.995815	0	-0.440268435	32.98713497	0	0	38	0	-0.440268435	32.98713497	0	1	41	40.400002	0	-1.32968914	9.181035721	1	4	4	4	3	3	2	20	3	4	4	4	3	3	21	2810	F
107	Mam Only	< $133	None	32	1	10.777455	1	37.205914	0	-0.824550535	20.48134071	0	0	38.714287	0	-1.515601497	6.481007413	1	1	41	40.400002	0	-2.102547838	1.775265687	1	4	1	4	3	3	4	19	4	4	4	5	1	4	22	2595	M
108	Mam Only	< $133	Basic	21	1	9.9557972	1	38.098774	0	0.484434889	68.59613685	0	1	41.142857	0	-0.510513244	30.48459693	0	1	40	40	0	-0.180409349	42.84156077	0	3	2	4	4	3	3	19	4	3	3	4	4	3	21	3190	F
109	Mam Only	< $133	Primary	20	1	12.432769	1	38.147041	0	0.277499603	60.93017447	0	0	37.57143	0	0.517937762	69.7749153	0	1	39	39.599998	0	-0.258300197	39.80876173	0	3	1	4	3	3	4	18	4	3	3	4	4	3	21	3106.6667	F
110	Mam Only	< $133	Diversified or higher	18	1	21.821428	2	37.964287	0	-0.125218761	45.01751825	0	0	37.714287	0	-0.000581133	49.97681614	0	0	37	38.799999	0	-0.485022689	31.38301256	0	3	2	4	3	3	3	18	3	3	4	3	3	3	19	3025	M
111	Mam Only	< $133	Primary	19	1	18.142857	2	36.142857	1	-0.453596927	32.50594829	0	1	32.714287	1	1.523208232	93.61466913	0	1	36	38.400002	0	-1.535498493	6.23307135	1	3	3	3	2	3	3	17	3	3	4	3	3	3	19	2540	M
112	Mam Only	< $133	Basic	21	1	19.75	2	39.75	0	-0.11845175	45.28548621	0	1	41.42857	0	-0.613811238	26.96700351	0	1	40	40	0	-0.210937061	41.64681921	0	3	3	4	2	3	4	19	4	4	3	3	3	4	21	3178.3333	F
113	Mam Only	$133-398	Primary	24	1	13.637126	2	35.92271	1	-2.05025032	2.017000494	1	1	41	0	-3.634403252	0.013931239	1	1	34	37.599998	0	-2.798670693	0.256567199	1	2	3	4	2	3	2	16	3	4	2	3	3	3	18	1825	F
114	Mam Only	< $133	Primary	24	1	15.785714	2	39.5	0	-0.892918245	18.59504777	0	0	41	0	-1.322512532	9.299876958	1	1	37	38.799999	0	-0.629616191	26.4472864	0	3	2	4	3	3	2	17	3	4	4	3	3	3	20	2871.6667	F
115	Spanish and Mam	< $133	Diversified or higher	22	1	13.428572	2	39.285713	0	0.142631195	55.67092702	0	0	38.57143	0	0.409788846	65.90195754	0	1	39	39.599998	0	0.039786565	51.58683563	0	3	2	4	4	3	3	19	4	3	4	3	3	3	20	3340	M
116	Mam Only	< $133	Primary	26	1	14.285715	2	40.714287	0	-1.756973843	3.946113387	1	1	42.714287	0	-2.159949856	1.538827579	1	1	42	40.799999	0	-1.793093468	3.647898997	1	3	2	4	4	3	2	18	4	4	4	4	4	4	24	2675	F
117	Mam Only	< $133	Basic	19	1	19.071428	2	37.642857	0	-2.349670873	0.939500873	1	0	37.285713	0	-2.233716958	1.275085125	1	1	33	37.200001	0	-2.172919729	1.489317966	1	1	3	4	2	2	3	15	3	4	2	3	3	3	18	2020	F
118	Mam Only	< $133	Primary	36	1	17	2	37.285713	0	-0.074389153	47.03503699	0	0	37.57143	0	-0.208952673	41.72425921	0	1	42	40.799999	0	-1.412203059	7.894508996	1	3	2	4	4	3	4	20	4	4	4	4	3	3	22	2823.3333	F
119	Spanish Only	$133-398	Primary	26	1	13.857142	2	38.57143	0	1.401224179	91.94264769	0	0	37.857143	0	1.648725025	95.03980095	0	1	38	39.200001	0	1.210525285	88.69613029	0	3	1	4	3	3	3	17	3	4	3	5	2	4	21	3780	M
120	Spanish Only	< $133	Primary	22	1	16.964285	2	37.67857	0	0.032267992	51.28708328	0	0	36.857143	1	0.416876485	66.16156228	0	1	39	39.599998	0	-0.728636968	23.31118794	0	3	2	3	4	3	3	18	4	4	4	3	3	3	21	3038.3333	M
121	Spanish and Mam	$133-398	Primary	22	1	16.928572	2	40.785713	0	-2.140352785	1.616313357	1	0	41	0	-2.21908578	1.324044465	1	1	34	37.599998	0	-0.976911637	16.43064502	0	3	1	4	2	3	3	16	3	4	3	2	3	3	18	2615	M
122	Mam Only	< $133	Diversified or higher	21	1	21.428572	2	37.285713	0	-0.596989413	27.52572245	0	1	34.714287	1	0.837728099	79.89082858	0	1	34	37.599998	0	-0.735416033	23.10430801	0	3	1	3	3	3	3	16	3	3	3	3	3	3	18	2631.6667	F
123	Mam Only	< $133	Primary	28	1	18.642857	2	37.5	0	-0.777109818	21.8546991	0	1	37.714287	0	-0.843079548	19.9591978	0	1	37	38.799999	0	-1.329924368	9.177159591	1	2	2	4	3	3	3	17	4	4	3	4	2	3	20	2693.3333	M
124	Mam Only	< $133	Primary	35	1	21.142857	2	40	0	-1.408282061	7.95237827	1	0	38.285713	0	-0.744671961	22.82350266	0	1	37	38.799999	0	-0.983161494	16.27639815	0	3	2	4	3	3	3	18	3	4	3	3	3	3	19	2831	M
125	Mam Only	$133-398	Primary	27	1	14.857142	2	39.57143	0	0.340085473	63.31039194	0	0	40.142857	0	0.147794491	55.87475214	0	1	40	40	0	0.19497522	57.72938265	0	3	2	3	4	3	4	19	4	4	4	3	3	3	21	3463.3333	M
126	Mam Only	< $133	Primary	18	1	22.035713	2	38.035713	0	-1.853201341	3.192675278	1	0	34.142857	1	0.334646658	63.10541778	0	1	35	38	0	-1.853201341	3.192675278	1	3	2	4	2	2	3	16	3	4	4	3	3	2	19	2288.3333	F
127	Spanish and Mam	$133-398	Primary	24	1	16.571428	2	37	0	-0.112322844	45.52837146	0	0	36.857143	1	-0.04074851	48.37481941	0	0	33	37.200001	0	-0.183103039	42.73585856	0	3	2	3	2	3	3	16	3	3	3	2	3	3	17	2756.6667	F
128	Spanish and Mam	< $133	Diversified or higher	20	1	16	2	39.57143	0	-0.694262289	24.37588678	0	0	40.857143	0	-1.135943365	12.79901339	0	1	37	38.799999	0	-0.416560624	33.8499908	0	3	2	3	2	3	3	16	4	4	4	3	3	3	21	3051.6667	M
129	Spanish and Mam	$133-398	Diversified or higher	18	1	18.535715	2	37.964287	0	-0.827096119	20.40912919	0	1	36.857143	1	-0.2881974	38.65978194	0	1	40	40	0	-1.606264842	5.410786585	1	4	2	4	3	3	4	20	4	4	4	4	1	3	20	2750	M
130	Spanish and Mam	< $133	Primary	30	1	14.188974	2	36.617466	1	-0.330421884	37.0540604	0	0	37.857143	0	-0.950423481	17.09485587	0	1	37	38.799999	0	-1.371226306	8.515221007	1	4	2	3	3	3	3	18	4	3	3	3	3	3	19	2676.6667	M
131	Mam Only	< $133	Primary	25	1	11.13486	1	38.134766	0	-1.012830254	15.55706235	0	0	41.142857	0	-1.98513773	2.3564575	1	1	33	37.200001	0	-0.544200782	29.3151657	0	2	2	3	2	3	3	15	3	4	3	2	3	3	18	2625	F
132	Mam Only	$133-398	Primary	18	1	17.75	2	38.607143	0	0.004550831	50.18155128	0	1	39.57143	0	-0.364801294	35.76298697	0	1	39	39.599998	0	-0.364801294	35.76298697	0	3	3	4	3	3	3	19	4	4	3	3	3	3	20	3066.6667	F
133	Spanish and Mam	< $133	Primary	25	1	17	2	38.42857	0	-0.790162159	21.4716536	0	0	37.57143	0	-0.4082539	34.15436402	0	1	38	39.200001	0	-1.070533012	14.21897289	0	3	2	3	4	3	3	18	3	4	3	4	3	3	20	2750	F
134	Mam Only	$133-398	Primary	36	1	13.230744	2	40.087891	0	-0.517762419	30.2312021	0	0	43.857143	0				0	35	38	0	0.269294872	60.61486111	0	3	1	3	3	3	3	16	3	4	3	3	3	3	19	3080	F
135	Mam Only	$133-398	Primary	25	1	17.571428	2	38.714287	0	-0.103051691	45.89609729	0	1	39.57143	0	-0.41843291	33.78153146	0	1	36	38.400002	0	0.009439664	50.3765825	0	3	2	3	3	3	3	17	3	3	4	3	3	3	19	3046.6667	F
136	Mam Only	< $133	Primary	34	1	13.714286	2	39.714287	0	-1.533778044	6.254213305	1	1	40.42857	0	-1.744729821	4.051595491	1	1	39	39.599998	0	-1.487493976	6.844219649	1	3	2	3	4	3	3	18	3	4	4	4	3	3	21	2650	F
137	Mam Only	< $133	None	31	1	19.142857	2	39	0	-2.47837659	0.659908799	1	0	40.42857	0	-2.889240732	0.193086656	1	1	39	39.599998	0	-2.655659744	0.395767172	1	3	2	3	3	4	3	18	3	4	4	4	3	3	21	2215	M
138	Mam Only	< $133	Primary	18	1	13.142858	2	37.857143	0	-0.254204327	39.96688539	0	0	38.42857	0	-0.501876092	30.78773419	0	1	37	38.799999	0	-0.675205403	24.97726371	0	3	2	3	4	3	3	18	4	4	3	3	3	2	19	2855	F
139	Mam Only	< $133	None	37	1	14.857142	2	38	0	0.930626862	82.39766929	0	0	37.285713	0	1.211543445	88.71564027	0	1	39	39.599998	0	0.356072476	63.91068556	0	3	2	3	4	3	3	18	4	4	3	4	3	3	21	3470	M
140	Mam Only	< $133	Primary	22	1	15.571428	2	36	1	-0.881624169	18.89900403	0	0	40.42857	0	-2.641650026	0.412516293	1	1	34	37.599998	0	-1.652330701	4.923357701	1	2	2	3	1	3	4	15	3	3	4	3	3	3	19	2341.6667	M
141	Mam Only	< $133	Primary	22	1	12.571428	1	39	0	-1.372813773	8.490512388	1	1	40.57143	0	-1.862572255	3.126123547	1	1	39	39.599998	0	-1.57043612	5.815684248	1	2	2	4	4	3	4	19	4	3	4	4	2	3	20	2618.3333	F
142	Mam Only	< $133	Primary	32	1	14.285714	2	39.285713	0	-1.535972576	6.227255323	1	1	38.714287	0	-1.327903067	9.210506565	1	1	36	38.400002	0	-1.214677991	11.22444649	0	2	1	3	3	3	3	15	4	4	4	4	2	3	21	2595	F
143	Spanish Only	< $133	Primary	20	1	16.285715	2	39	0	-0.071444129	47.15221449	0	0	37.714287	0	0.445958213	67.21862847	0	1	43	41.200001	0	-0.818609092	20.6504739	0	3	3	4	3	3	3	19	4	4	4	4	4	4	24	3210	M
144	Mam Only	< $133	Primary	22	1	18.535715	2	38.535713	0	-0.547227329	29.21112814	0	0	38.57143	0	-0.547227329	29.21112814	0	1	39	39.599998	0	-0.924609051	17.75846517	0	3	2	3	3	4	3	18	4	3	3	4	3	4	21	2860	F
145				23	1	14.428572	2	38.285713	0	-0.481810705	31.49702122	0	0	37.142857	0	0.03213258	51.28168393	0	1	39	39.599998	0	-0.998161934	15.9100421	0	2	2	4	4	3	4	19	4	4	3	4	2	3	20	2933.3333	M
146	Mam Only	< $133	Primary	29	1	13.714286	2	39.714287	0	-1.598934715	5.491755469	1	0	39.285713	0	-1.456937023	7.256688259	1	1	38	39.200001	0	-1.406711811	7.975643094	1	3	3	3	4	3	3	19	3	4	3	3	3	3	19	2625	F
147	Mam Only	< $133	None	38	1	12.857142	1	38	0	-1.074300173	14.13440838	0	0	37.857143	0	-1.01076125	15.60653568	0	1	35	38	0	-1.074300173	14.13440838	0	3	2	4	2	3	2	16	3	4	3	3	3	3	19	2580	F
148	Spanish Only	$133-398	None	32	1	19.92857	2	37.642857	0	-0.798431714	21.23100028	0	0	33.57143	1	1.307134858	90.44165427	0	0	33	37.200001	0	-0.594318689	27.61494906	0	3	2	3	2	3	2	15	4	3	3	3	3	2	18	2685	M
149	Mam Only	< $133	Primary	31	1	14.428572	2	40.57143	0	-2.483933119	0.649701049	1	0	40.285713	0	-2.41556162	0.785548194	1	1	37	38.799999	0	-1.99541518	2.299880832	1	3	2	4	3	3	3	18	3	4	3	3	3	3	19	2358.3333	F
150	Mam Only	< $133	Primary	27	1	13.535714	2	41.535713	0	-0.955244083	16.97271388	0	0	42	0	-1.050983181	14.66331572	0	1	40	40	0	-0.517056134	30.25584871	0	4	2	3	4	3	3	19	4	4	4	3	3	3	21	3063.3333	F
151	Spanish and Mam	< $133	Primary	19	1	16.285715	2	36.714287	1	-0.930267456	17.61163116	0	0	33.42857	1	0.924841489	82.2475817	0	1	38	39.200001	0	-1.970359042	2.439861808	1	3	2	4	3	3	3	18	4	3	3	4	3	3	20	2470	M
152	Mam Only	< $133	Primary	18	1	17.714287	2	39.714287	0	-0.13588304	44.59568717	0	1	40.857143	0	-0.522502403	30.06602869	0	1	45	42	0	-0.858776926	19.52318	0	3	3	4	4	3	4	21	4	4	4	4	4	4	24	3290	M
153	Mam Only	< $133	Basic	19	1	13.428572	2	40.142857	0	-0.828283449	20.37549969	0	0	38.714287	0	-0.319810068	37.45561573	0	1	37	38.799999	0	-0.375860363	35.35103546	0	3	2	3	3	3	3	17	4	4	3	3	3	3	20	2965	F
154	Mam Only	< $133	Basic	18	1	21.035715	2	37.17857	0	-0.901018511	18.37892388	0	1	39.42857	0	-1.850831193	3.209692103	1	1	36	38.400002	0	-1.474640646	7.015459051	1	3	2	3	3	3	3	17	3	4	3	3	3	3	19	2565	M
155	Spanish and Mam	< $133	Primary	31	1	17.642857	2	37.642857	0	-1.571123081	5.807703114	1	0	38.42857	0	-1.921480196	2.733559833	1	1	38	39.200001	0	-2.168098511	1.507559607	1	2	4	3	2	3	3	17	3	3	3	5	3	4	21	2326.6667	F
156	Mam Only	< $133	Primary	29	1	19.214287	2	37.785713	0	-0.176325035	43.00192974	0	0	37.285713	0	0.022012646	50.8781066	0	1	39	39.599998	0	-0.924609051	17.75846517	0	3	2	4	4	3	3	19	4	4	3	3	3	3	20	2860	F
157	Spanish Only	$133-398	Diversified or higher	21	1	10.534866	1	39.249165	0	-0.045722461	48.17657306	0	1						1	38	39.200001	0	0.004952505	50.19757556	0	3	3	4	3	3	3	19	3	4	3	3	3	3	19	3150	F
158	Mam Only	< $133	Basic	22	1	15.142858	2	38.714287	0	-0.978708642	16.38619805	0	0	37.285713	0	-0.343817637	36.54917177	0	1	36	38.400002	0	-0.859661852	19.49877346	0	3	1	2	4	3	3	16	4	3	4	3	3	3	20	2810	M
159	Mam Only	< $133	None	32	1	20.714285	2	36.42857	1	-0.950427	17.09476652	0	0	33.142857	1	1.182699495	88.15358677	0	1	36	38.400002	0	-1.874866237	3.040556397	1	3	2	4	3	3	3	18	3	3	3	3	3	3	18	2345	F
160	Spanish and Mam	< $133	Basic	21	1	12.857142	1	41.285713	0	-0.948229477	17.15063219	0	0	41.142857	0	-0.91195535	18.08961112	0	1	38	39.200001	0	-0.282899153	38.86270718	0	3	2	4	3	3	4	19	3	4	3	3	3	3	19	3040	F
161	Mam Only	< $133	None	30	1	11.033484	1	39.462055	0	-0.773598793	21.95840431	0	1						1	36	38.400002	0	-0.371986021	35.49516286	0	3	2	3	3	3	3	17	3	4	3	3	3	3	19	3000	M
162	Mam Only	$133-398	Primary	36	1	19.642857	2	38.785713	0	-1.81403636	3.483606409	1	0	39.714287	0	-2.161881154	1.531366902	1	1	36	38.400002	0	-1.703519092	4.423548411	1	2	3	3	1	2	3	14	4	4	4	4	2	4	22	2470	M
163	Mam Only	< $133	Primary	37	1	14.214286	2	33.214287	1	0.918193986	82.07413418	0	1	38.857143	0	-1.96338445	2.480075964	1	1	37	38.799999	0	-1.96338445	2.480075964	1	3	2	4	4	3	3	19	3	3	3	3	3	3	18	2428.3333	M
164	Mam Only	$133-398	None	24	1	17.642857	2	39.07143	0	-1.0223584	15.33056511	0	0	39.285713	0	-1.077384701	14.0654218	0	1	39	39.599998	0	-1.184208625	11.81652445	0	2	2	4	3	3	3	17	4	4	3	4	3	4	22	2860	M
165	Mam Only	< $133	Primary	24	1	13.928572	2	37.785713	0	-0.505636162	30.65560453	0	0	37.57143	0	-0.439776414	33.0049526	0	1	36	38.400002	0	-0.821238448	20.57552302	0	3	2	4	3	3	3	18	3	4	3	3	2	3	18	2825	M
166	Spanish and Mam	< $133	Primary	27	1	17.964287	2	38.535713	0	-0.89483326	18.54381138	0	0	38	0	-0.651099994	25.74909701	0	1	36	38.400002	0	-0.836019194	20.15720527	0	2	1	3	4	2	3	15	4	4	3	4	2	4	21	2733.3333	F
167	Spanish and Mam	< $133	Primary	25	1	14.857142	2	38.857143	0	-1.792851007	3.649837552	1	0	40.142857	0	-2.190691151	1.423707493	1	1	35	38	0	-1.459178191	7.225803486	1	3	2	3	3	3	2	16	3	4	3	3	3	3	19	2438.3333	F
168	Mam Only	Don't know	Diversified or higher	23	1	14.142858	2	39.857143	0	-1.948305146	2.568923087	1	0	39.57143	0	-1.853291531	3.192029222	1	1	33	37.200001	0	-0.850063503	19.76448907	0	2	2	4	2	3	3	16	2	4	4	2	3	2	17	2585	M
169	Mam Only	$133-398	Diversified or higher	27	1	17.214285	2	40.5	0	-0.616217014	26.88756502	0	0	40.285713	0	-0.530803049	29.77776333	0	1	46	42.400002	0	-1.062378625	14.40319168	0	4	3	4	3	3	4	21	4	4	4	5	4	4	25	3091.6667	F
170	Mam Only	Don't know	Diversified or higher	18	1	16.142857	2	36.142857	1	-1.127260725	12.98161314	0	0	40.57143	0	-2.778643098	0.272932321	1	0	35	38	0	-2.014213553	2.199355869	1	3	2	4	2	3	4	18	3	3	3	2	3	3	17	2225	F
171	Mam Only	$133-398	Primary	23	1	21.571428	2	37.142857	0	-2.332825289	0.982865842	1	0	34.42857	1	-0.928509201	17.65717487	0	1	38	39.200001	0	-3.019780059	0.126479153	1	3	2	4	3	3	2	17	3	4	4	4	3	3	21	1960	M
172	Mam Only	$133-398	Basic	20	1	20.714285	2	39.42857	0	-1.989185615	2.334035954	1	0	38.714287	0	-1.731678947	4.166537059	1	1	40	40	0	-2.17388325	1.485695214	1	3	2	4	4	3	3	19	4	3	4	4	3	3	21	2505	M
173	Mam Only	< $133	Diversified or higher	26	1	18.714285	2	39	0	0.324050685	62.70501691	0	0	38.57143	0	0.484791535	68.60878861	0	1	38	39.200001	0	0.271603976	60.70367289	0	3	2	4	2	3	3	17	4	4	4	3	3	3	21	3371.6667	M
174	Mam Only	$133-398	Primary	23	1	9.1428576	1	36.285713	1	0.661189176	74.57544991	0	0	38.857143	0	-0.502317403	30.77221346	0	1	36	38.400002	0	-0.329781837	37.07824063	0	3	2	3	2	3	3	16	4	4	3	3	3	3	20	2918.3333	F
175	Mam Only	< $133	Basic	19	1	19	2	38.57143	0	-1.281070043	10.00845326	0	0	39	0	-1.443806171	7.439675286	1	1	34	37.599998	0	-0.846520202	19.86313043	0	3	2	3	3	3	3	17	2	3	3	3	3	3	17	2591.6667	F
176	Mam Only	$133-398	None	26	1	7.1428571	1	37.142857	0	-0.054179504	47.83960751	0	0	41.285713	0	-1.643826268	5.010604686	1	1	32	36.799999	1	0.080781799	53.21922583	0	3	2	3	2	3	3	16	3	3	3	2	2	3	16	2898.3333	M
177	Mam Only	< $133	None	29	1	14	2	40.57143	0	-0.408756777	34.13590815	0	0	40	0	-0.215503136	41.46875337	0	0	41	40.400002	0	-0.361513304	35.88578805	0	4	2	4	3	3	4	20	4	4	4	3	3	3	21	3298.3333	M
178	Spanish Only	< $133	Primary	24	1	13.857142	2	39.42857	0	-1.892096725	2.923904732	1	0	38.285713	0	-1.479660582	6.948192511	1	1	38	39.200001	0	-1.798187714	3.607363295	1	3	2	4	3	3	2	17	4	4	4	3	3	3	21	2475	F
179	Mam Only	< $133	Primary	28	1	19	2	39	0	0.082032413	53.26895308	0	0	40	0	-0.259148204	39.77604468	0	1	41	40.400002	0	-0.391255279	34.78042759	0	3	2	4	3	3	4	19	4	4	4	3	3	4	22	3160	F
180	Spanish Only	$133-398	Diversified or higher	21	1	21.785715	2	34.642857	1	-0.481930013	31.49278324	0	0	37.285713	0	-2.034436581	2.095379834	1	1																					2100	F
181	Mam Only	< $133	Primary	32	0	19.321428	2	37.17857	0				0	34	1				0																						M
182	Mam Only	< $133	Primary	20	0	20	2	36.57143	1				0	36.285713	1				0	38	39.200001	0				4	1	3	3	4	4	19	3	3	3	4	3	3	19		F
183	Mam Only	Don't know	Primary	22	0	9.6234922	1	34.195034	1				0	40	0				0	34	37.599998	0				3	2	3	2	4	3	17	2	3	3	3	3	3	17		F
184	Mam Only	$133-398	Diversified or higher	21	1	19.333334	2	31.761997	1				1	28.857143	1				0	34	37.599998	0				3	2	4	2	3	3	17	3	2	3	3	3	3	17	2380	M
185	Spanish and Mam	$133-398	Diversified or higher	22	0	19.142857	2	37.57143	0				1	36.857143	1				0	42	40.799999	0				4	2	3	4	4	4	21	3	3	4	4	3	4	21		F
186	Mam Only	< $133	Primary	23	1	14.333333	2	38.190571	0	0.239755541	59.47401124	0	0	34.42857	1	2.060068959	98.03040255	0	0																					3091.6667	F
187	Mam Only	< $133	Primary	31		19.5	2	34.92857	1				0	33.857143	1																										M
188	Mam Only	< $133	Primary	24	1	10	1	38.57143	0	-2.43901517	0.7363675	1	0	38.714287	0	-2.485596746	0.646672136	1	1																					2135	F
